# Supplementary material
Source: publisher figshare collection journal article supplement (https://frontiersin.figshare.com/ndownloader/files/12942761)
Supplement: Supplementary file [file 12942761]

## Supplementary Material

### Enhanced bacterial growth and gene expression of D-amino acid dehydrogenase with D-glutamate as a sole carbon source

Takeshi Naganuma\*, Yoshiakira Iinuma, Hitomi Nishiwaki, Ryota Murase, Kazuo Masaki, Ryosuke Nakai

\* Correspondence: Takeshi Naganuma: takn@hiroshima-u.ac.jp

**Supplementary Table S3.** Cultured cell mass (wet weight, g) and activity of D-amino acid dehydrogenase (DAD) with ferricyanide<sup>3-</sup> or NAD<sup>+</sup> as an oxidant in each 20-mL liquid culture of strain A25, *Raoultella ornithinolytica* JCM 6096<sup>T</sup> and *Pseudomonas aeruginosa* JCM 5962<sup>T</sup>. The DAD activity was measured by spectrophotometry and is represented based on the changes in optical density (OD) in liquid-culture supernatants and pelletized-cell extracts. Timings of measurements were determined referring to the maximum cell density (OD<sub>600</sub>) as: 1/4 Max (early exponential phase), 1/2 Max (mid-exponential phase) and Max with approximately 1/4, 1/2 and 1/1 of the maximum OD<sub>600</sub>, respectively, as well as stationary phase (Stat.) about 5-12 hours after Max.

#### A25 - Ferricyanide

| Time    |     | Cell mass | Total DAD activity in a 20-mL culture |       |                 |       |       | Total DAD activity per cell mass (g <sup>-1</sup> ) |       |              |       |       |
|---------|-----|-----------|---------------------------------------|-------|-----------------|-------|-------|-----------------------------------------------------|-------|--------------|-------|-------|
|         |     |           | Whole super.                          |       | Whole cell ext. |       | Sum   | Culture super.                                      |       | Cell extract |       | Sum   |
| T       | h   | g         | Ave                                   | SD    | Ave             | SD    | Ave   | Ave                                                 | SD    | Ave          | SD    | Ave   |
| 1/4 Max | 21  | 0.082     | 0.246                                 | 0.018 | 0.148           | 0.001 | 0.394 | 2.994                                               | 0.216 | 1.810        | 0.011 | 4.804 |
| 1/2 Max | 42  | 0.144     | 1.133                                 | 0.022 | 0.216           | 0.004 | 1.349 | 7.865                                               | 0.151 | 1.500        | 0.029 | 9.365 |
| Max     | 92  | 0.268     | 0.388                                 | 0.018 | 0.060           | 0.000 | 0.448 | 1.448                                               | 0.066 | 0.224        | 0.000 | 1.672 |
| Stat.   | 102 | 0.259     | 0.578                                 | 0.022 | 0.065           | 0.001 | 0.643 | 2.232                                               | 0.084 | 0.250        | 0.004 | 2.482 |

#### *Raoultella ornithinolytica* JCM 6096<sup>T</sup> - Ferricyanide

| Time    |     | Cell mass | Total DAD activity in a 20-mL culture |       |                 |       |       | Total DAD activity per cell mass (g <sup>-1</sup> ) |       |              |       |       |
|---------|-----|-----------|---------------------------------------|-------|-----------------|-------|-------|-----------------------------------------------------|-------|--------------|-------|-------|
|         |     |           | Whole super.                          |       | Whole cell ext. |       | Sum   | Culture super.                                      |       | Cell extract |       | Sum   |
| T       | h   | g         | Ave                                   | SD    | Ave             | SD    | Ave   | Ave                                                 | SD    | Ave          | SD    | Ave   |
| 1/4 Max | 67  | 0.040     | 0.119                                 | 0.000 | 0.089           | 0.005 | 0.208 | 2.970                                               | 0.000 | 2.230        | 0.120 | 5.200 |
| 1/2 Max | 84  | 0.079     | 0.246                                 | 0.033 | 0.176           | 0.000 | 0.422 | 3.108                                               | 0.419 | 2.228        | 0.000 | 5.336 |
| Max     | 120 | 0.155     | 0.475                                 | 0.000 | 0.038           | 0.004 | 0.514 | 3.066                                               | 0.000 | 0.248        | 0.025 | 3.314 |
| Stat.   | 130 | 0.144     | 0.277                                 | 0.000 | 0.053           | 0.002 | 0.330 | 1.925                                               | 0.000 | 0.369        | 0.012 | 2.294 |

#### *Pseudomonas aeruginosa* JCM 5962<sup>T</sup> - Ferricyanide

| Time |  | Cell mass | Total DAD activity in a 20-mL culture |  |                 |  |     | Total DAD activity per cell mass (g <sup>-1</sup> ) |  |              |  |     |
|------|--|-----------|---------------------------------------|--|-----------------|--|-----|-----------------------------------------------------|--|--------------|--|-----|
|      |  |           | Whole super.                          |  | Whole cell ext. |  | Sum | Culture super.                                      |  | Cell extract |  | Sum |

| T       | h  | g     | Ave   | SD    | Ave   | SD    | Ave   | Ave   | SD    | Ave   | SD    | Ave   |
|---------|----|-------|-------|-------|-------|-------|-------|-------|-------|-------|-------|-------|
| 1/4 Max | 17 | 0.114 | 0.642 | 0.018 | 0.054 | 0.002 | 0.695 | 5.627 | 0.155 | 0.470 | 0.019 | 6.098 |
| 1/2 Max | 30 | 0.208 | 0.863 | 0.018 | 0.196 | 0.004 | 1.059 | 4.150 | 0.085 | 0.942 | 0.018 | 5.093 |
| Max     | 75 | 0.310 | 0.000 | 0.028 | 0.050 | 0.000 | 0.050 | 0.000 | 0.090 | 0.161 | 0.000 | 0.161 |
| Stat.   | 80 | 0.299 | 0.000 | 0.000 | 0.077 | 0.002 | 0.077 | 0.000 | 0.000 | 0.257 | 0.006 | 0.257 |

**A25 - NAD**

| Time    |     | Cell mass | Total DAD activity in a 20-mL culture |       |              |       |       | Total DAD activity per cell mass (g <sup>-1</sup> ) |       |              |       |        |
|---------|-----|-----------|---------------------------------------|-------|--------------|-------|-------|-----------------------------------------------------|-------|--------------|-------|--------|
|         |     |           | Culture super.                        |       | Cell extract |       | Sum   | Culture super.                                      |       | Cell extract |       | Sum    |
| T       | h   | g         | Ave                                   | SD    | Ave          | SD    | Ave   | Ave                                                 | SD    | Ave          | SD    | Ave    |
| 1/4 Max | 21  | 0.082     | 0.451                                 | 0.035 | 0.060        | 0.000 | 0.511 | 5.505                                               | 0.432 | 0.732        | 0.000 | 6.237  |
| 1/2 Max | 42  | 0.144     | 1.212                                 | 0.045 | 0.306        | 0.004 | 1.518 | 8.415                                               | 0.314 | 2.125        | 0.026 | 10.540 |
| Max     | 92  | 0.268     | 2.416                                 | 0.028 | 0.386        | 0.001 | 2.801 | 9.013                                               | 0.104 | 1.439        | 0.003 | 10.452 |
| Stat.   | 102 | 0.259     | 3.588                                 | 0.035 | 0.557        | 0.003 | 4.145 | 13.852                                              | 0.137 | 2.150        | 0.012 | 16.002 |

***Raoultella ornithinolytica* JCM 6096<sup>T</sup> - NAD**

| Time    |     | Cell mass | Total DAD activity in a 20-mL culture |       |                 |       |       | Total DAD activity per cell mass (g <sup>-1</sup> ) |       |              |       |        |
|---------|-----|-----------|---------------------------------------|-------|-----------------|-------|-------|-----------------------------------------------------|-------|--------------|-------|--------|
|         |     |           | Whole super.                          |       | Whole cell ext. |       | Sum   | Culture super.                                      |       | Cell extract |       | Sum    |
| T       | h   | g         | Ave                                   | SD    | Ave             | SD    | Ave   | Ave                                                 | SD    | Ave          | SD    | Ave    |
| 1/4 Max | 67  | 0.040     | 0.086                                 | 0.001 | 0.402           | 0.001 | 0.488 | 2.140                                               | 0.022 | 10.060       | 0.022 | 12.200 |
| 1/2 Max | 84  | 0.079     | 1.085                                 | 0.060 | 0.103           | 0.002 | 1.188 | 13.735                                              | 0.760 | 1.306        | 0.023 | 15.041 |
| Max     | 120 | 0.155     | 2.328                                 | 0.043 | 0.245           | 0.002 | 2.574 | 15.022                                              | 0.280 | 1.582        | 0.015 | 16.604 |
| Stat.   | 130 | 0.144     | 2.067                                 | 0.081 | 0.296           | 0.004 | 2.363 | 14.355                                              | 0.564 | 2.053        | 0.025 | 16.408 |

***Pseudomonas aeruginosa* JCM 5962<sup>T</sup> - NAD**

| Time    |    | Cell mass | Total DAD activity in a 20-mL culture |       |                 |       |       | Total DAD activity per cell mass (g <sup>-1</sup> ) |       |              |       |        |
|---------|----|-----------|---------------------------------------|-------|-----------------|-------|-------|-----------------------------------------------------|-------|--------------|-------|--------|
|         |    |           | Whole super.                          |       | Whole cell ext. |       | Sum   | Culture super.                                      |       | Cell extract |       | Sum    |
| T       | h  | g         | Ave                                   | SD    | Ave             | SD    | Ave   | Ave                                                 | SD    | Ave          | SD    | Ave    |
| 1/4 Max | 17 | 0.114     | 1.560                                 | 0.082 | 0.132           | 0.004 | 1.693 | 13.686                                              | 0.720 | 1.161        | 0.036 | 14.848 |
| 1/2 Max | 30 | 0.208     | 3.485                                 | 0.000 | 0.382           | 0.000 | 3.867 | 16.754                                              | 0.000 | 1.837        | 0.000 | 18.590 |
| Max     | 75 | 0.310     | 5.504                                 | 0.000 | 0.625           | 0.005 | 6.130 | 17.756                                              | 0.000 | 2.017        | 0.017 | 19.773 |
| Stat.   | 80 | 0.299     | 8.482                                 | 0.071 | 0.702           | 0.002 | 9.184 | 28.369                                              | 0.237 | 2.346        | 0.006 | 30.715 |
